# Supplementary material for: Natural Isotopic Signatures of Variations in Body Nitrogen Fluxes: A Compartmental Model Analysis
Source: PLOS journal article supplement (doi:10.1371/journal.pcbi.1003865), 2014-10-02
Supplement: S13 (10.1371/journal.pcbi.1003865.s013) [file journal.pcbi.1003865.s013]

**Text S3. Definitions and relationships between the model state variables and parameters and details on the derivation of model equations.**

Each compartment  $i$  in the model is defined by its total nitrogen (N) content ( $N_i = {}^{14}\text{N}_i + {}^{15}\text{N}_i$ ) and its isotopic enrichment ( $\delta^{15}\text{N}_i$ ), which constitute the two state variables or species of the model. The amount of  ${}^{15}\text{N}$  in compartment  $i$  can be calculated using the usual definition of  $\delta^{15}\text{N}_i$ :

$$\delta^{15}\text{N}_i = \left( \frac{{}^{15}\text{N}_i / {}^{14}\text{N}_i}{R_{\text{standard}}} - 1 \right) \times 1000$$

and by approximating the isotope ratio  ${}^{15}\text{N}_i / {}^{14}\text{N}_i$  using the  ${}^{15}\text{N}_i / N_i$  ratio (i.e., the fractional abundance), so that:

$${}^{15}\text{N}_i \approx N_i \times \left( \frac{\delta^{15}\text{N}_i}{1000} + 1 \right) \times R_{\text{std}} \quad (\text{E1})$$

where  $R_{\text{std}}$  is the N isotope ratio for the internationally defined standard (atmospheric  $\text{N}_2$ ,  $R_{\text{std}}=0.0036765$ ).

In the model, for each compartment  $i$ , we defined inward and outward fluxes of total N ( $f_{i,j}$  and  $f_{j,i}$ , respectively) and of the heavy N isotope ( ${}^{15}f_{i,j}$  and  ${}^{15}f_{j,i}$ , respectively). These fluxes were assumed to follow mass action laws and were modeled according to the following equations:

$$\begin{aligned} f_{i,j}(t) &= k_{i,j} \times N_i(t) \quad \text{and} \quad {}^{15}f_{i,j}(t) = {}^{15}k_{i,j} \times {}^{15}N_j(t) \quad \text{for the inward flux from compartment } j \text{ to } i, \\ f_{j,i}(t) &= k_{j,i} \times N_i(t) \quad \text{and} \quad {}^{15}f_{j,i}(t) = {}^{15}k_{j,i} \times {}^{15}N_i(t) \quad \text{for the outward flux from compartment } i \text{ to } j, \end{aligned}$$

where  $k_{j,i}$  and  $k_{i,j}$  are the reaction rate constants ( $\text{d}^{-1}$ ) for the corresponding N fluxes.

and  ${}^{15}k_{j,i}$  and  ${}^{15}k_{i,j}$  are the reaction rate constants ( $\text{d}^{-1}$ ) for the corresponding  ${}^{15}\text{N}$  fluxes.

We defined the fractionation factor  $\epsilon_{j,i}$ , representing the isotopic effect associated with the flux  $f_{j,i}$ , as  $\epsilon_{j,i} = (\alpha_{j,i} - 1) \times 1000$ , with  $\alpha_{j,i} = {}^{15}k_{j,i} / k_{j,i}$ . (E2)

Each compartment  $i$  is characterized by two differential equations describing respectively the kinetic evolution of its total N content ( $N_i$ ) and its isotopic enrichment ( $\delta^{15}\text{N}_i$ ).

**Evolution of the total N content of compartment i:**

According to the mass conservation principle, the evolution of total N content in compartment  $i$  is described by the following equation:

$$\frac{dN_i(t)}{dt} = \sum_j f_{i,j} - \sum_j f_{j,i} = \sum_j (k_{i,j} \times N_j(t)) - \sum_j (k_{j,i} \times N_i(t)) \quad (\text{E3})$$

Under the assumption of elemental steady state, the total N amounts in compartments are constants (i.e.,  $dN_i(t)/dt = 0$ ) and consequently Eq. E3 simplifies to:

$$\sum_j f_{i,j} = \sum_j f_{j,i}$$

Evolution of the isotopic enrichment of compartment i:

The equation describing the isotopic enrichment of compartment i was derived by applying the mass conservation principle to the heavy N isotope ( $^{15}\text{N}$ ), as:

$$\frac{d^{15}\text{N}_i(t)}{dt} = \sum_j {}^{15}f_{i,j}(t) - \sum_j {}^{15}f_{j,i}(t) \quad (\text{E4})$$

Consequently, the evolution of the  $^{15}\text{N}$  amount in compartment i can be expressed as:

$$\frac{d^{15}\text{N}_i(t)}{dt} = \sum_j ({}^{15}k_{i,j} \times {}^{15}\text{N}_j(t)) - \sum_j ({}^{15}k_{j,i} \times {}^{15}\text{N}_i(t)) \quad (\text{E5})$$

Using Eq. (E1) and applying the Leibniz rule to calculate the derivatives of  $(N_i \times \delta^{15}\text{N}_i)$ , Eq. E5 can be rewritten as:

$$\frac{N_i}{1000} \times \frac{d\delta^{15}\text{N}_i(t)}{dt} + \left(\frac{\delta^{15}\text{N}_i}{1000} + 1\right) \times \frac{dN_i(t)}{dt} = \sum_j \left[ {}^{15}k_{i,j} \times N_j(t) \times \left(\frac{\delta^{15}\text{N}_j}{1000} + 1\right) \right] - \sum_j \left[ {}^{15}k_{j,i} \times N_i(t) \times \left(\frac{\delta^{15}\text{N}_i}{1000} + 1\right) \right]$$

By introducing the isotopic fractionation factors  $\alpha_{j,i}$  and  $\alpha_{i,j}$ , defined according to Eq E2, the previous equation can be rewritten as:

$$\frac{N_i}{1000} \times \frac{d\delta^{15}\text{N}_i(t)}{dt} + \left(\frac{\delta^{15}\text{N}_i}{1000} + 1\right) \times \frac{dN_i(t)}{dt} = \sum_j \left[ \alpha_{i,j} \times k_{i,j} \times N_j(t) \times \left(\frac{\delta^{15}\text{N}_j}{1000} + 1\right) \right] - \sum_j \left[ \alpha_{j,i} \times k_{j,i} \times N_i(t) \times \left(\frac{\delta^{15}\text{N}_i}{1000} + 1\right) \right]$$

which combined with Eq. E3, and using the mass action relations for the  $f_{j,i}$  and  $f_{i,j}$  fluxes, yields the following equation:

$$\frac{N_i}{1000} \times \frac{d\delta^{15}\text{N}_i(t)}{dt} = \sum_j \left[ f_{i,j}(t) \times \left( \alpha_{i,j} - 1 + \alpha_{i,j} \times \frac{\delta^{15}\text{N}_j(t)}{1000} - \frac{\delta^{15}\text{N}_i(t)}{1000} \right) \right] - \sum_j \left[ f_{j,i}(t) \times (\alpha_{j,i} - 1) \times \left( \frac{\delta^{15}\text{N}_i}{1000} + 1 \right) \right]$$

Using the  $\varepsilon$  notation ( $\alpha = \varepsilon/1000 + 1$ ) and assuming that  $\varepsilon$  and  $\delta^{15}\text{N}$  are negligible compared to 1000, this equation can be rearranged to yield the final equation describing the evolution of the nitrogen isotopic enrichment in compartment i:

$$\frac{d\delta^{15}\text{N}_i(t)}{dt} = \sum_j \left[ \frac{f_{i,j}(t)}{N_i} \times (\varepsilon_{i,j} + \delta^{15}\text{N}_j(t) - \delta^{15}\text{N}_i(t)) \right] - \sum_j \left[ \frac{f_{j,i}(t)}{N_i} \times \varepsilon_{j,i} \right] \quad (\text{E6})$$

It should be noted that  $\epsilon_{j,i}$  is approximately equal to the difference between the isotopic enrichment of flux  $f_{j,i}$  and that of its precursor compartment  $i$ , according to the following equation:

$$\epsilon_{j,i} = \delta^{15}\text{N}f_{j,i}(t) - \delta^{15}\text{N}_i(t), \text{ where } \delta^{15}\text{N}_{i,j} \text{ is the isotopic enrichment of flux } f_{i,j}.$$
